# Supplementary material
Source: PubMed Central journal article supplement (PMC10592093)
Supplement: NIHMS1925636-supplement-1.pdf [file NIHMS1925636-supplement-1.pdf]

## **Supplementary Material: Development of a web-based, adaptive clinical prediction tool for kidney replacement therapy in children with chronic kidney disease**

### ***Table of contents***

Description of cross-validation and external validation methods.

Supplementary Table S1. List of variables evaluated in random survival forest analysis to identify potential predictive candidates in subsequent parametric survival models to predict time to kidney replacement therapy.

Supplementary Table S2. Distribution of specific chronic kidney disease diagnoses represented in the study population (n= 890).

Supplementary Table S3. Akaike Information Criterion (AIC) values as a measure of test error from different functional forms of GFR, proteinuria and interactions with diagnosis as modifiers of the location parameter ( $\beta$ ) in generalized gamma parametric survival model.

Supplementary Table S4. Ranking of variables from random survival forest according to top 20 minimal depth of maximal subtree classification and top 20 variable importance.

Supplementary Table S5. Descriptive characteristics of the ESCAPE cohort used for external validation.

Supplementary Figure S1. Cohort flow diagram of those with no follow-up time, prevalent kidney replacement therapy event prior to time origin, and those with missed visits at the time origin.

Supplementary Figure S2. Kaplan-Meier estimates of cumulative incidence of kidney replacement therapy in the CKiD cohort.

Supplementary Figure S3. Results from best subset selection of top 9 variables identified from random survival forest analysis presenting Akaike information criterion (AIC) on best subset models with additional variables ( $2^9= 512$ , including the elementary model as the null model).

Supplementary Figure S4. Kaplan-Meier estimates of cumulative incidence of ESKD in the ESCAPE cohort.

Supplementary Figure S5. Results and interpretation from external validation of elementary model using data from the ESCAPE study including calibration plot depicting observed risk on predicted risk from at 5-year risk of kidney replacement therapy and survival function of standardized times of residuals for participants.

Supplementary Appendix 1. R Code of models presented in Table 2 and used in the online clinical calculator for a hypothetical patient profile.

Supplementary Appendix 2. Content from online clinical calculator describing model purpose, use, strengths and limitations designed for clinicians.

Supplementary Table S6. List of principal site investigators of the Chronic Kidney Disease in Children (CKiD) cohort study.

## Cross-validation and external validation methods

### *Cross-validation*

We conducted 10-fold cross-validation of the entire model-building process<sup>1,2</sup>. In this procedure, 10 random samples comprising 90% of the data were used to develop the elementary and final models with the concatenation of the remaining 10% per fold used to evaluate model fit. In the model development stage of the cross-validation, we executed the same three-step process described above so the results from the functional forms of elementary model predictors, the random survival forest (RSF), and best subset selection were allowed to vary.

For the 10 folds, model parameters were estimated in each set of 90% of the data and yielded  $\hat{S}_k$  as the estimate of the survival function for the  $k$ th fold (for  $k= 1$  to 10). For the 10% excluded in that fold, standardized times were calculated as  $w_{ki} = -\log(\hat{S}_k(t_{ki}))$  for the  $i$ th individual in the  $k$ th fold. If the prediction is valid, the full concatenation of the excluded data are expected to correspond to a sample subjected to censoring from the standard exponential distribution ( $e^{-t}$ ). To explore this, we graphically depicted the survival function of  $w_{ki}$  overlaid with the standard exponential survival function.<sup>3</sup>

### *External validation*

To externally validate our model, we assessed the calibration and discrimination in previously published data from the European Study Consortium for Chronic Kidney Disorders Affecting Pediatric Patients (ESCAPE) study<sup>4</sup>. Among 270 ESCAPE participants, we used the first available visit with complete data on U25 eGFR, proteinuria and diagnosis to evaluate the elementary model. To account for regional differences in KRT initiation, the outcome was time to KRT or U25eGFR of 20 ml/min|1.73m<sup>2</sup> which was interpolated between two visits when the second visit had U25eGFR < 20 ml/min|1.73m<sup>2</sup>.

We conducted the Greenwood-Nam-D'Agostino goodness-of-fit test (calibration) for 5-year risk, calculated the c-statistic (discrimination), and evaluated the residual standardized times relative to the standard exponential (a measure of calibration) as described in the cross-validation methods.

### *References*

1. Altman DG, Royston P. What do we mean by validating a prognostic model? *Stat Med*. 2000;19(4):453-473.
2. Steyerberg EW, Harrell FE, Borsboom GJ, Eijkemans MJ, Vergouwe Y, Habbema JD. Internal validation of predictive models: efficiency of some procedures for logistic regression analysis. *J Clin Epidemiol*. 2001;54(8):774-781.
3. Ng DK, Matheson MB, Warady BA, Mendley SR, Furth SL, Muñoz A. Incidence of Initial Renal Replacement Therapy Over the Course of Kidney Disease in Children. *Am J Epidemiol*. 2019;188(12):2156-2164. doi:10.1093/aje/kwz220
4. Furth SL, Pierce C, Hui WF, et al. Estimating Time to ESRD in Children With CKD. *Am J Kidney Dis*. 2018;71(6):783-792. doi:10.1053/j.ajkd.2017.12.011

Supplementary Table S1. List of variables evaluated in random survival forest analysis to identify potential predictive candidates in subsequent parametric survival models to predict time to kidney replacement therapy. Continuous time-varying variables denoted by \* were included as level at study origin (visit 2) and annualized change from the previous year (visit 1 to visit 2). Categorical time-varying variables denoted by † are included as presence at study origin (visit 2) and incident/initiated, persistent/continued, resolved/discontinued from the previous year (visit 1 to visit 2). Total time-fixed and time-varying variables included 172 predictors.

| <b><u>Sociodemographic</u></b>                                   | <b><u>Laboratory markers</u></b>           | <b><u>Medications</u></b>         |
|------------------------------------------------------------------|--------------------------------------------|-----------------------------------|
| Sex                                                              | Sodium*                                    | Any antihypertensive†             |
| Age                                                              | Potassium*                                 | Diuretic†                         |
| Maternal education                                               | Chloride*                                  | ACE/ARB†                          |
| Household income                                                 | CO2*                                       | Active vitamin D†                 |
| Family history of kidney disease (first, second or third degree) | Acidosis†                                  | Inactive vitamin D†               |
| <b><u>CKD severity</u></b>                                       | Glucose*                                   | Phosphate binder†                 |
| U25eGFR*                                                         | Albumin*                                   | Alkali therapy†                   |
| UPCR*                                                            | Hypoalbuminemia†                           | Growth hormone†                   |
| Years with CKD                                                   | Calcium*                                   | Erythropoietin stimulating agent† |
| Anemia†                                                          | Phosphate*                                 | Iron supplement†                  |
| change in hemoglobin z-score                                     | Calcium-phosphate product*                 | Lipid lowering†                   |
| BP stage*                                                        | Elevated Ca×P†                             | Potassium binder†                 |
| <b><u>Growth and development</u></b>                             | Leukocyte count*                           | Corticosteroid†                   |
| Height z-score*                                                  | Erythrocyte count*                         | Immunosuppressant†                |
| Short stature†                                                   | Platelets*                                 | Bladder med†                      |
| BMI z-score*                                                     | Hematocrit*                                | Laxative†                         |
| Mid-upper arm circumference z-score*                             | Mean corpuscular hemoglobin concentration* | Antacid†                          |
|                                                                  | Mean corpuscular hemoglobin*               | Antibiotic†                       |
| <b><u>Birth history</u></b>                                      | Mean corpuscular volume*                   | Asthma/allergy†                   |
| Low birth weight                                                 | Red cell distribution width*               | CNS stimulant†                    |
| Premature                                                        | Triglycerides                              | Nutrition supplement†             |
| Small for gestational age                                        | High density lipoprotein (HDL)             | Vitamin supplement†               |
|                                                                  | Low density lipoprotein                    |                                   |
|                                                                  | Total cholesterol                          |                                   |
|                                                                  | Non-HDL                                    |                                   |
|                                                                  | Dyslipidemia                               |                                   |

\* For continuous variables, the annualized change of the variable between visit 1 and visit 2 (study origin) was calculated as calculated as:

$$(Variable_{v2} - Variable_{v1}) / (Years\ from\ V1\ to\ V2)$$

† For binary variables, including comorbidities (e.g., anemia, metabolic acidosis) and therapies (e.g., ACE/ARB, alkali therapy), the time-varying variable was classified by four categories defined as:

| Visit 1 | Visit 2<br>(study origin) | Comorbidity presence | Therapy use  |
|---------|---------------------------|----------------------|--------------|
| No      | No                        | Absent               | None         |
| No      | Yes                       | Incident             | Initiated    |
| Yes     | No                        | Resolved             | Discontinued |
| Yes     | Yes                       | Persistent           | Continued    |

Supplementary Table S2. Distribution of specific chronic kidney disease diagnoses represented in the study population (n= 890).

| <b>Non-glomerular/HUS kidney disease diagnosis</b>     | <b>n= 704</b> | <b>Glomerular kidney disease diagnosis</b>                              | <b>n= 186</b> |
|--------------------------------------------------------|---------------|-------------------------------------------------------------------------|---------------|
| Aplastic/hypoplastic/dysplastic kidneys                | 23.4% (165)   | Focal segmental glomerulosclerosis                                      | 35.0% (65)    |
| Obstructive uropathy                                   | 22.4% (158)   | Systemic immunological disease (including systemic Lupus erythematosus) | 17.7% (33)    |
| Reflux nephropathy                                     | 16.6% (117)   | Chronic glomerulonephritis                                              | 10.8% (20)    |
| Hemolytic uremic syndrome (HUS)                        | 6.8% (48)     | IgA Nephropathy (Berger's)                                              | 7.5% (14)     |
| Congenital Urologic Disease (Bilateral Hydronephrosis) | 6.0% (42)     | Familial nephritis (Alport's)                                           | 6.5% (12)     |
| Non-glomerular Other                                   | 5.5% (39)     | Membranoproliferative glomerulonephritis type I                         | 5.4% (10)     |
| Polycystic kidney disease (Autosomal recessive)        | 4.0% (28)     | Glomerular other                                                        | 4.8% (9)      |
| Renal infarct                                          | 3.3% (23)     | Henoch schonlein nephritis                                              | 3.8% (7)      |
| Cystinosis                                             | 1.7% (12)     | Idiopathic crescentic glomerulonephritis                                | 3.2% (6)      |
| Pyelonephritis/Interstitial nephritis                  | 1.6% (11)     | Membranous nephropathy                                                  | 2.2% (4)      |
| Medullary cystic disease/Juvenile nephronophthisis     | 1.4% (10)     | Congenital nephrotic syndrome                                           | 1.6% (3)      |
| Perinatal Asphyxia                                     | 1.4% (10)     | Membranoproliferative glomerulonephritis type II                        | 1.1% (2)      |
| Syndrome of agenesis of abdominal musculature          | 1.1% (8)      | Sickle cell nephropathy                                                 | 0.5% (1)      |
| VACTERL (VATER) Syndrome                               | 1.0% (7)      |                                                                         |               |
| Branchio-oto-Renal Disease/Syndrome                    | 1.0% (7)      |                                                                         |               |
| Wilms' tumor                                           | 0.9% (6)      |                                                                         |               |
| Methylmalonic Acidemia                                 | 0.9% (6)      |                                                                         |               |
| Polycystic kidney disease (Autosomal dominant)         | 0.7% (5)      |                                                                         |               |
| Oxalosis                                               | 0.3% (2)      |                                                                         |               |

Supplementary Table S3. AIC values as a measure of test error from different functional forms of GFR, proteinuria (UPCR) and interactions with diagnosis (glomerular with no HUS vs. non-glomerular with HUS) as modifiers of the location  $\beta$  parameter in generalized gamma parametric survival model. **Bold** indicated lowest AIC. The AIC of the null model with no covariates (i.e., predictors) was 2021.164.

| Functional form of GFR      | Functional form of UPCR      | Modifiers |                    |                    |                              |
|-----------------------------|------------------------------|-----------|--------------------|--------------------|------------------------------|
|                             |                              | GFR UPCR  | GFR×Diagnosis UPCR | GFR UPCR×Diagnosis | GFR×Diagnosis UPCR×Diagnosis |
| Continuous                  | Continuous                   | 1492.528  | 1490.358           | 1487.446           | 1488.356                     |
| Natural spline (knot at 45) | Continuous                   | 1486.931  | 1480.883           | 1481.642           | 1480.863                     |
| Linear spline (knot at 45)  | Continuous                   | 1486.270  | 1480.123           | 1480.768           | 1480.225                     |
| Continuous                  | Natural spline (knot at 0.5) | 1483.722  | 1483.241           | 1483.327           | 1484.559                     |
| Natural spline (knot at 45) | Natural spline (knot at 0.5) | 1479.916  | 1476.965           | 1479.498           | 1479.106                     |
| Linear spline (knot at 45)  | Natural spline (knot at 0.5) | 1479.402  | 1476.493           | 1478.753           | 1478.872                     |
| Continuous                  | Linear spline (knot at 0.5)  | 1484.409  | 1483.604           | 1483.328           | 1484.608                     |
| Natural spline (knot at 45) | Linear spline (knot at 0.5)  | 1480.263  | 1476.778           | 1479.309           | 1479.286                     |
| Linear spline (knot at 45)  | Linear spline (knot at 0.5)  | 1479.907  | <b>1476.477</b>    | 1478.661           | 1479.052                     |

Supplementary Table S4. Ranking of variables from random survival forest according to top 20 minimal depth of maximal subtree classification and top 20 variable importance.

| <b>Variable</b>                 | <b>Min Depth of Max Subtree</b> | <b>Min Depth Rank</b> | <b>Importance</b> | <b>Importance Rank</b> |
|---------------------------------|---------------------------------|-----------------------|-------------------|------------------------|
| U25eGFR                         | 5.503                           | #1                    | 0.0532            | #1                     |
| UPCR                            | 5.914                           | #2                    | 0.0273            | #2                     |
| Albumin                         | 8.357                           | #3                    | 0.0041            | #6                     |
| Ann change in UPCR              | 8.465                           | #4                    | 0.0046            | #5                     |
| Persistent anemia               | 10.582                          | #12                   | 0.0080            | #3                     |
| Potassium                       | 9.095                           | #6                    | 0.0035            | #9                     |
| Anemia                          | 11.299                          | #14                   | 0.0058            | #4                     |
| Ann change in U25eGFR           | 10.117                          | #8                    | 0.0037            | #7                     |
| Chloride                        | 9.145                           | #7                    | 0.0036            | #8                     |
| Phosphate                       | 8.780                           | #5                    | 0.0026            | #15                    |
| Hematocrit                      | 10.482                          | #10                   | 0.0033            | #10                    |
| Red blood cell count            | 10.525                          | #11                   | 0.0027            | #13                    |
| CO <sub>2</sub>                 | 10.325                          | #9                    | 0.0007            | #21                    |
| ESA initiation                  | 11.393                          | #15                   | 0.0027            | #14                    |
| ESA use                         | 12.024                          | #21                   | 0.0032            | #11                    |
| Calcium × Phosphate             | 11.659                          | #17                   | 0.0011            | #18                    |
| Active Vitamin D                | 12.717                          | #28                   | 0.0028            | #12                    |
| Hypoalbuminemia                 | 12.427                          | #23                   | 0.0016            | #16                    |
| Non-HDL                         | 11.654                          | #16                   | 0.0006            | #26                    |
| ACE/ARB discontinuation         | 12.468                          | #25                   | 0.0014            | #17                    |
| Blood pressure stage            | 12.013                          | #20                   | 0.0006            | #25                    |
| Calcium                         | 10.720                          | #13                   | 0.0003            | #43                    |
| Red cell distribution width     | 11.680                          | #18                   | 0.0004            | #34                    |
| LDL                             | 12.001                          | #19                   | 0.0003            | #36                    |
| Persistent active vitamin D use | 13.238                          | #41                   | 0.0010            | #19                    |
| Persistent hypoalbuminemia      | 13.356                          | #48                   | 0.0007            | #20                    |

Supplementary Table S5. Baseline descriptive characteristics of the ESCAPE cohort (n= 270) used for external validation.

| <b>Characteristic</b>                 | <b>Median [IQR] or n (%)</b> |
|---------------------------------------|------------------------------|
| <i>Demographic and height</i>         |                              |
| Age, years                            | 11.9 [8.6, 14.9]             |
| Male sex                              | 158 (59%)                    |
| Height, m                             | 1.43 [1.25, 1.61]            |
| <i>Kidney disease characteristics</i> |                              |
| Glomerular non-HUS diagnosis          | 16 (6%)                      |
| Serum creatinine, mg/dL               | 1.5 [1.2, 2.0]               |
| U25eGFR, ml/min 1.73 m <sup>2</sup>   | 36 [27, 44]                  |
| Urine protein/creatinine ratio, mg/mg | 0.33 [0.10, 0.89]            |
| Urine protein/creatinine > 2          | 32 (12%)                     |



Supplementary Figure S1. Cohort flow diagram of those with no follow-up time, prevalent kidney replacement therapy event prior to time origin, and those with missed visits at the time origin.

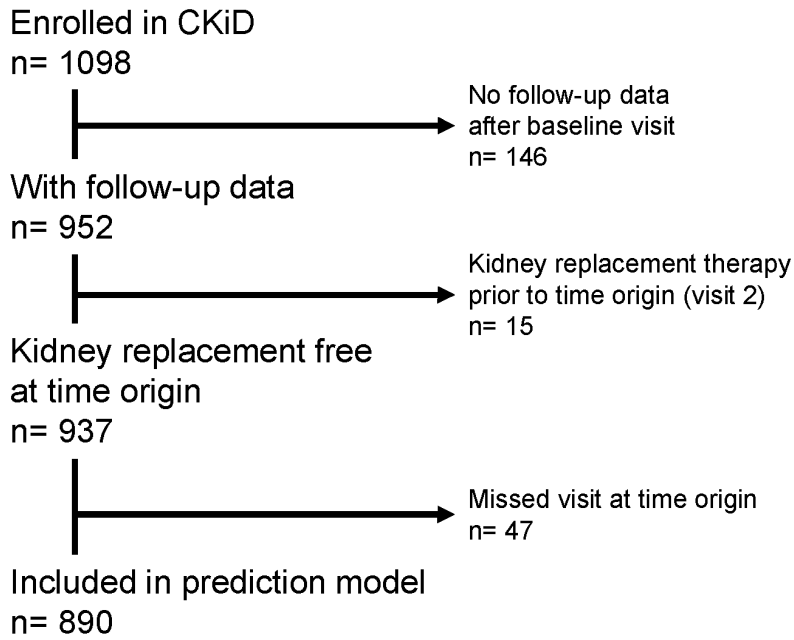

Supplementary Figure S2. Kaplan-Meier estimates of cumulative incidence of kidney replacement therapy in the CKiD cohort with 95% confidence intervals (discontinuous lines) and censored observations indicated by vertical ticks.

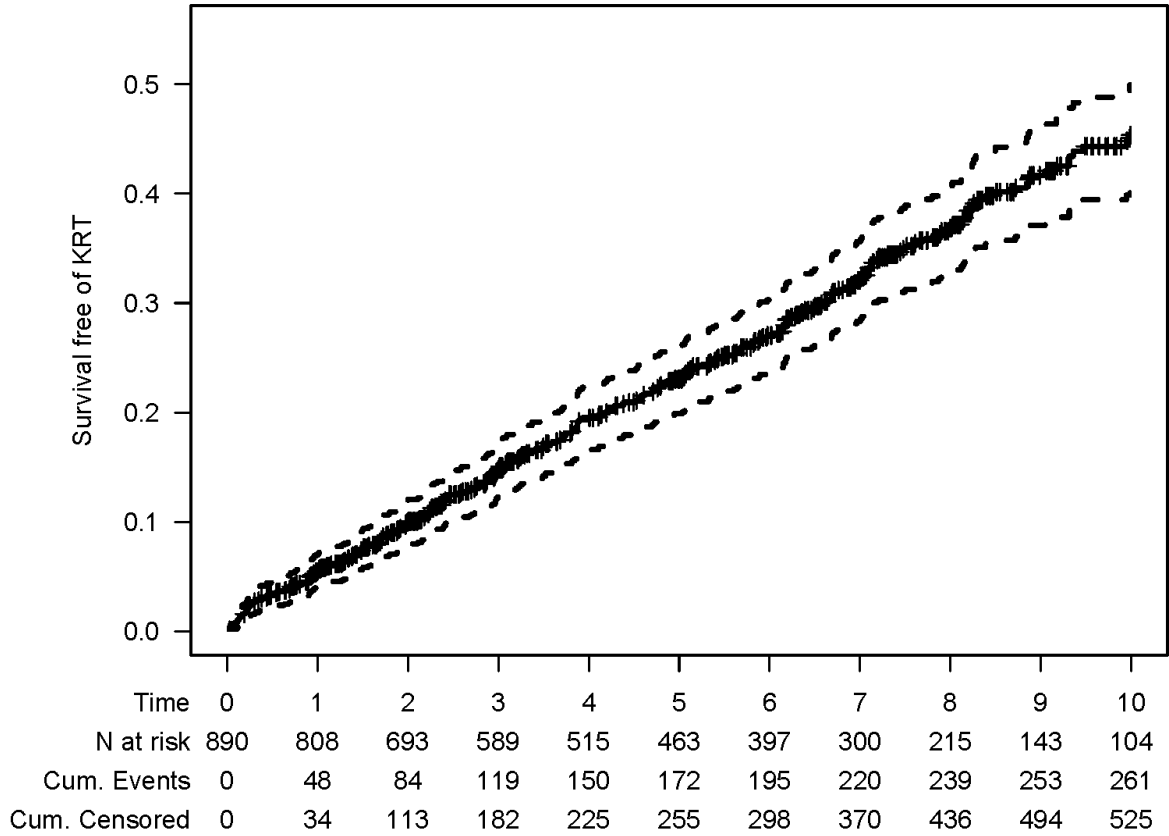

Supplementary Figure S3. Results from best subset selection of top 9 variables identified from random survival forest analysis presenting Akaike information criterion (AIC) on best subset models with additional variables ( $2^9 = 512$ , including the elementary model as the null model). Red dots indicate the lowest AIC within each set of additional enrichment variables. The lowest AIC of all models was identified in the model with 5 additional enrichment variables and this model corresponds to the enriched model in Table 2.

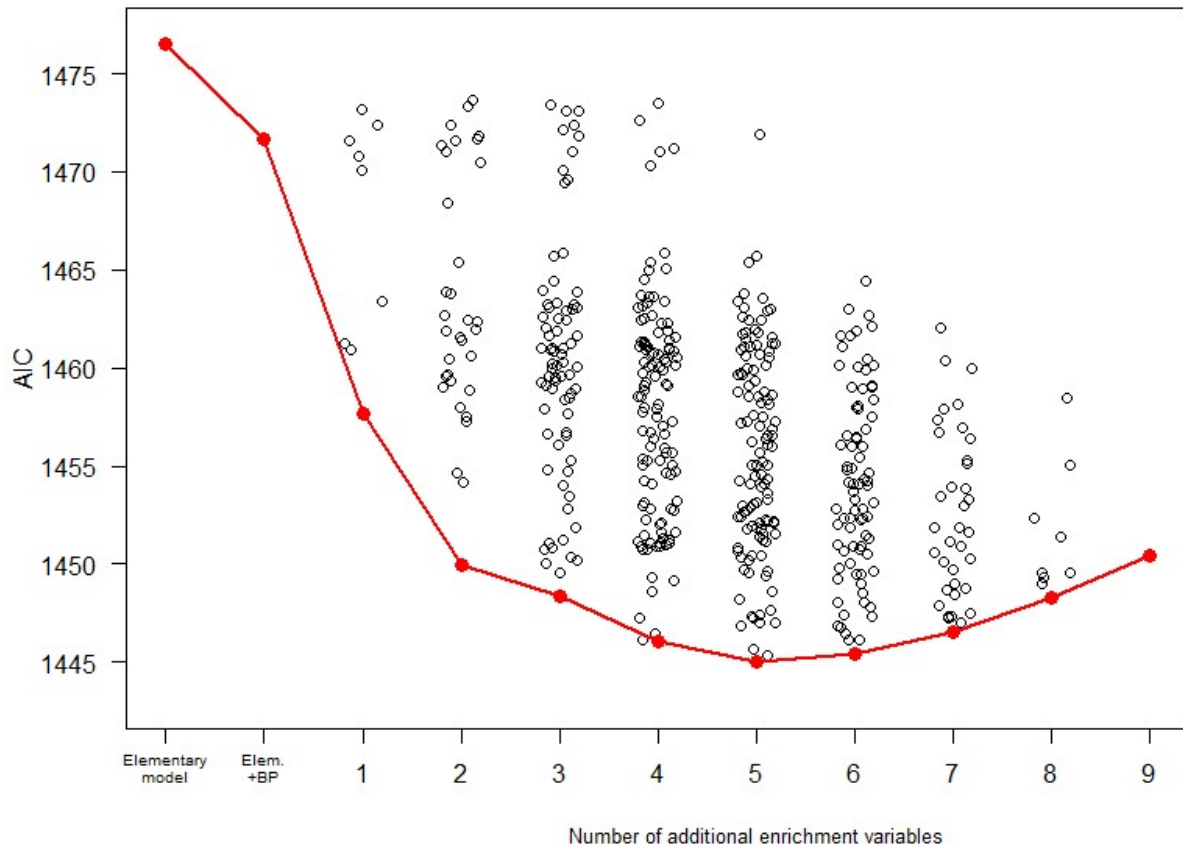

Supplementary Figure S4. Kaplan-Meier estimates of cumulative incidence of ESKD in the ESCAPE cohort with 95% confidence intervals (discontinuous lines) and censored observations indicated by vertical ticks.

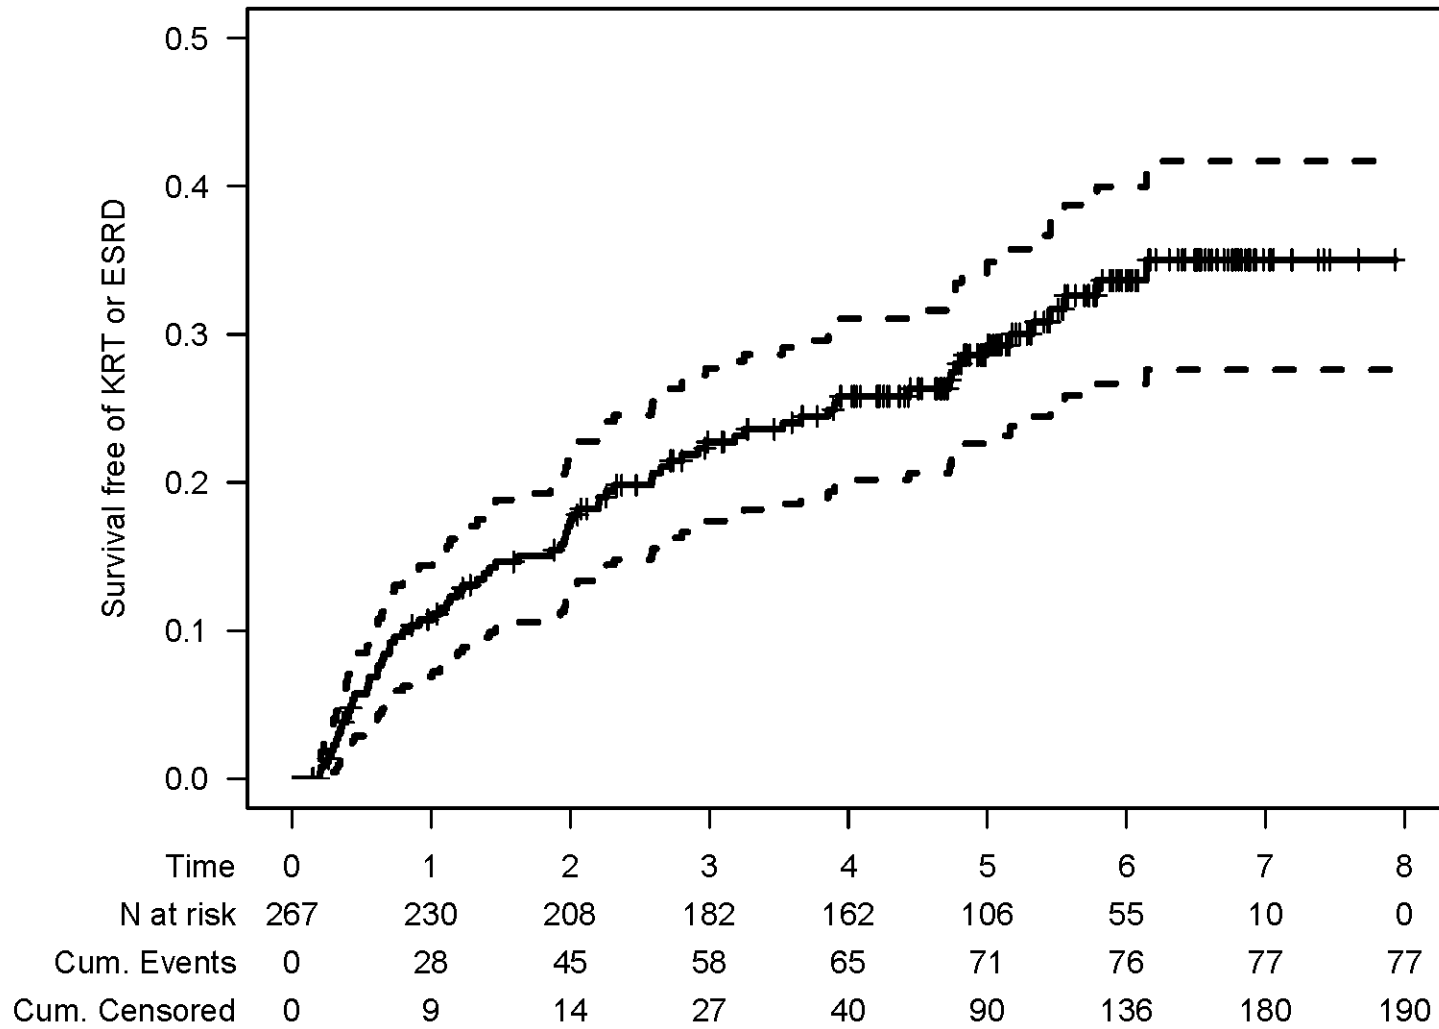

Supplementary Figure S5. Results and interpretation from external validation of elementary model using data from the ESCAPE study including calibration plot depicting observed risk on predicted risk from at 5-year risk of kidney replacement therapy or eGFR < 20 ml/min|1.73m<sup>2</sup> and survival function of standardized residual times for participants. The calibration plot demonstrates close correspondence between observed and predicted 5-year risk and the survival function aligns closely with the expected standard exponential for strong model fit.

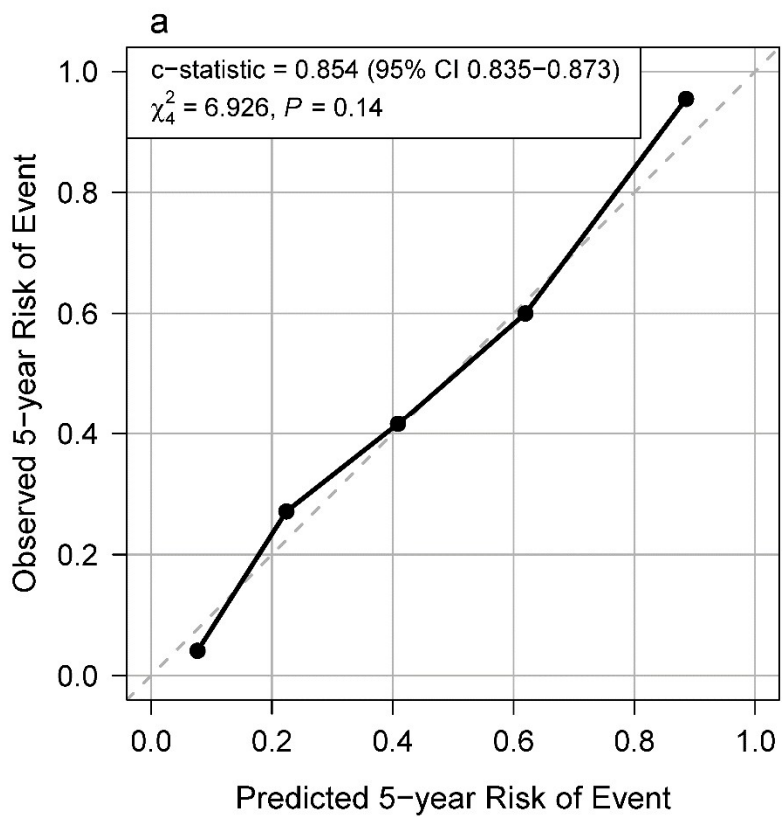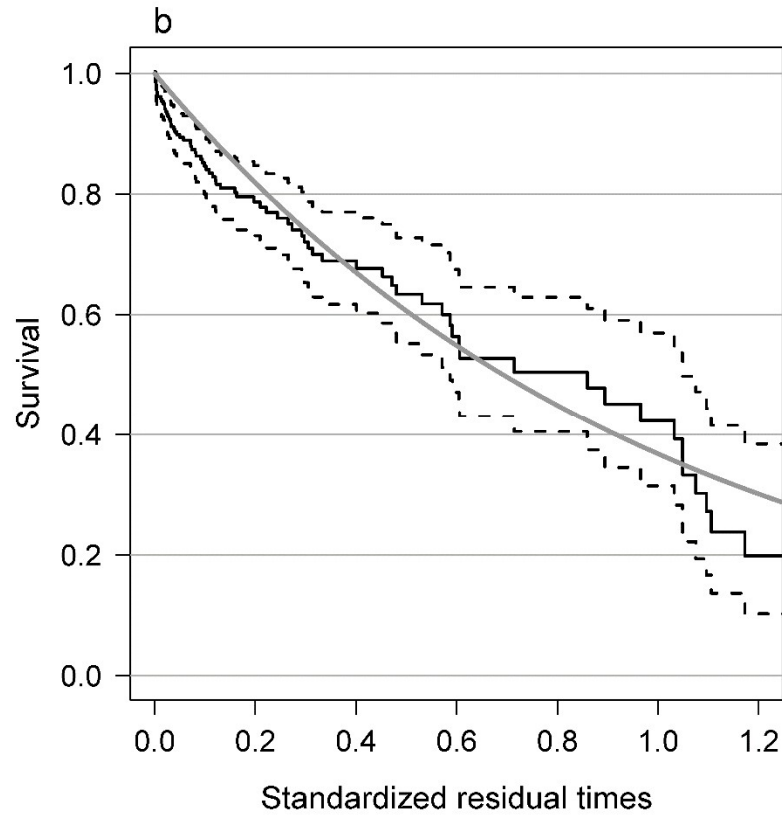

Supplementary Figure S5 presents data from the external validation of the elementary model using European ESCAPE data. The left panel presents the Greenwood-Nam-D'Agostino test for 5-year risk comparing the observed 5-year risk (y-axis) to the predicted 5-year risk (x-axis) using bins of participants of similar predicted 5-year risk with at least 5 observed events per bin. There were no significant differences between the observed risk and predicted risk ( $\chi^2_4 = 6.926$ ;  $p = 0.140$ ), the calibration slope was 0.996 (95%CI: 0.903, 1.088,  $p = 0.90$ ), and the c-statistic was 0.854 (95%CI: 0.835, 0.873) indicating strong discrimination. The right panel presents the standardized times of residuals which were congruent with the standard exponential function depicted in green.

**Supplementary Appendix S1. R code to generate 10<sup>th</sup>, 25<sup>th</sup> and 50<sup>th</sup> percentile of kidney replacement therapy risk from elementary model, partially enriched models 1 to 4, and the fully enriched model using example profile provided in the Results section of the paper.**

```
# Demonstration of CKiD risk prediction calculator
# install.packages("flexsurv") ## Install flexsurv package if not in library
already
library(flexsurv)

### Step 1: Input the profile of a hypothetical patient
## Necessary components for the Elementary model described in Table 2 of
paper
kid.gfr <- 60 # GFR in ml/min|1.73m2
kid.upc <- 0.8 # Urine protein-creatinine ratio in mg/mgCr; check units
carefully
kid.glomdx <- 1 # Glomerular, non-HUS diagnosis = 1; Non-glomerular or HUS
diagnosis = 0

# Components for the Partially Enriched and Enriched models described in
Table 2 of paper
kid.highbp <- 1 # High blood pressure = 1; normal blood pressure = 0
kid.anemia <- 1 # Anemia as low hemoglobin = 1; normal hemoglobin = 0
kid.albumin <- 4.5 # Serum albumin in g/dL; check units carefully
kid.chloride <- 105 # Chloride in mmol/dL; check units carefully
kid.co2 <- 22 # Bicarbonate in mmol/L; check units carefully
kid.prevgfr <- 67 # Previous GFR from about one year ago, ml/min|1.73m2
kid.prevgfryrs <- 1 #GFR was 48 when checked 1 years ago, can be in decimals;
e.g., a value of 0.95 is 0.95 years earlier than the current GFR input date

### Step 2: Use models described in Table 2 to output the times by which 10%,
25% and 50% will experience the outcome (KRT) based on the profile in Step 1.
## Times are expressed as years (note: 1 month= 0.0833 years)
## Uses the function qgengamma in the flexsurv package which provides values
of quantiles for the specified generalized gamma distribution
# the first argument specifies the desired quantiles (10th, 25th and 50th
or median) which are measures of predicted risk from the prediction tool
# The next three arguments correspond to coefficients reported in the paper
that modify Beta (mu), sigma (sigma) and kappa (Q)
percentile.header <- c("10th pctile", "25th pctile", "50th pctile") # To
improve readability of output, label header of the first three times with
corresponding percentiles

# Elementary model
times.elem <- round(qgengamma(c(0.1,0.25,0.5), mu = 2.8624 +
2.0868*log(kid.gfr/45) - 1.0758*max(c(0,log(kid.gfr/45))) - 0.1532*kid.glomdx
+ 1.0386*kid.glomdx*log(kid.gfr/45) -
1.2154*kid.glomdx*max(c(0,log(kid.gfr/45))) - 0.1959*log(kid.upc/0.5) -
0.3146*max(c(0,log(kid.upc/0.5))), sigma = 0.7440 + 0.2627*kid.glomdx, Q =
0.4253 - 0.0005*kid.glomdx), 3)
print(as.data.frame(times.elem, row.names=percentile.header))

# Partially enriched model 1: elementary + hypertension + deltaGFR only
times.pel <- round(qgengamma(c(0.1,0.25,0.5), mu = 2.8993 +
1.9511*log(kid.gfr/45) - 1.0091*max(c(0,log(kid.gfr/45))) - 0.0718*kid.glomdx
+ 0.8132*kid.glomdx*log(kid.gfr/45) -
```

```

1.0010*kid.glomdx*max(c(0,log(kid.gfr/45))) - 0.2123*log(kid.upc/0.5) -
0.2721*max(c(0,log(kid.upc/0.5))) - 0.2229*kid.highbp +
0.4349*(log(kid.gfr/kid.prevgfr)/kid.prevgfryrs), sigma = 0.7454 +
0.1744*kid.glomdx, Q = 0.3888 + 0.2204*kid.glomdx),3)
print(as.data.frame(times.pe1,row.names=percentile.header))

# Partially enriched model 2: elementary + hypertension + anemia only
times.pe2 <- round(qgengamma(c(0.1,0.25,0.5), mu = 2.9967 +
1.9769*log(kid.gfr/45) - 1.1370*max(c(0,log(kid.gfr/45))) - 0.0511*kid.glomdx
+ 0.9807*kid.glomdx*log(kid.gfr/45) -
1.0714*kid.glomdx*max(c(0,log(kid.gfr/45))) - 0.2127*log(kid.upc/0.5) -
0.2566*max(c(0,log(kid.upc/0.5))) - 0.2337*kid.highbp - 0.3617*kid.anemia,
sigma = 0.7441 + 0.2521*kid.glomdx, Q = 0.3513 + 0.1023*kid.glomdx),3)
print(as.data.frame(times.pe2,row.names=percentile.header))

# Partially enriched model 3: elementary + hypertension + albumin + co2 +
chloride only
times.pe3 <- round(qgengamma(c(0.1,0.25,0.5), mu = 3.7450 +
2.1789*log(kid.gfr/45) - 1.3874*max(c(0,log(kid.gfr/45))) - 0.1071*kid.glomdx
+ 0.6812*kid.glomdx*log(kid.gfr/45) -
0.5795*kid.glomdx*max(c(0,log(kid.gfr/45))) - 0.1720*log(kid.upc/0.5) -
0.2102*max(c(0,log(kid.upc/0.5))) - 0.2242*kid.highbp + 0.3802*kid.albumin +
0.0005*kid.co2 - 0.0235*kid.chloride, sigma = 0.7204 + 0.2426*kid.glomdx, Q =
0.4467 + 0.0768*kid.glomdx),3)
print(as.data.frame(times.pe3,row.names=percentile.header))

# Partially enriched model 4: elementary + hypertension + anemia + albumin +
co2 + chloride corresponds to an enriched "Current day" model
times.pe4 <- round(qgengamma(c(0.1,0.25,0.5), mu = 4.4095 +
2.0944*log(kid.gfr/45) - 1.4511*max(c(0,log(kid.gfr/45))) - 0.0231*kid.glomdx
+ 0.7360*kid.glomdx*log(kid.gfr/45) -
0.6282*kid.glomdx*max(c(0,log(kid.gfr/45))) - 0.1984*log(kid.upc/0.5) -
0.1803*max(c(0,log(kid.upc/0.5))) - 0.2339*kid.highbp - 0.3162*kid.anemia +
0.3168*kid.albumin - 0.0074*kid.co2 - 0.0248*kid.chloride, sigma = 0.7242 +
0.2172*kid.glomdx, Q = 0.4163 + 0.1367*kid.glomdx),3)
print(as.data.frame(times.pe4,row.names=percentile.header))

# Fully enriched model: elementary + hypertension + anemia + albumin + co2 +
chloride + deltaGFR corresponds to "Current day" + deltaGFR (longitudinal)
model which is fully enriched
times.full <- round(qgengamma(c(0.1,0.25,0.5), mu = 4.4493 +
1.9837*log(kid.gfr/45) - 1.4158*max(c(0,log(kid.gfr/45))) + 0.0268*kid.glomdx
+ 0.6275*kid.glomdx*log(kid.gfr/45) -
0.5253*kid.glomdx*max(c(0,log(kid.gfr/45))) - 0.1968*log(kid.upc/0.5) -
0.1759*max(c(0,log(kid.upc/0.5))) - 0.2282*kid.highbp - 0.3033*kid.anemia +
0.3172*kid.albumin - 0.0071*kid.co2 - 0.0255*kid.chloride +
0.3934*(log(kid.gfr/kid.prevgfr)/kid.prevgfryrs), sigma = 0.7262 +
0.1390*kid.glomdx, Q = 0.3914 + 0.2787*kid.glomdx),3)
print(as.data.frame(times.full,row.names=percentile.header))

```



## **Supplementary Appendix S2. Content from online clinical calculator describing model purpose, use, strengths and limitations designed for clinicians.**

Website: [https://ckid-gfrcalculator.shinyapps.io/CKiD\\_KRT\\_Risk/](https://ckid-gfrcalculator.shinyapps.io/CKiD_KRT_Risk/)

### **Pediatric CKiD Kidney Replacement Therapy Risk Calculator**

This calculator provides estimated times to when a patient diagnosed with CKD may require kidney replacement therapy (KRT). These estimates are based on a set of variables that are routinely measured on patients. It is intended to aid clinicians in managing kidney disease for pediatric patients below the age of 18 years.

The tool requires information on current markers of kidney health: CKD diagnosis, GFR and proteinuria. Additional variables include blood pressure category, anemia, serum albumin, serum chloride, serum bicarbonate and GFR from approximately one year ago. Not all additional variables are required for a valid estimate of estimated time to kidney replacement therapy, but additional variables will yield improved prediction.

Please note these are estimated times to needing KRT according to information provided. Please interpret the estimated times within the context of the patient's full clinical profile.

### **Frequently Asked Questions**

#### ***About the calculator***

*What is the purpose of this calculator?*

The calculator is designed to help clinicians estimate the time to initiation of kidney replacement therapy (transplant or dialysis) for a pediatric patient with diagnosed kidney disease. The calculation is based on the patient's clinical variables.

*How was this calculator developed?*

This calculator is based on data from a study of North American children and adolescents with a pediatric diagnosis of kidney disease (specifically, the Chronic Kidney Disease in Children study, called CKiD). Statistical learning methods (random survival forests, best subset regression) were used to identify candidate predictors of time to kidney replacement therapy and determine the most predictive survival models using the generalized gamma distribution. The model was internally validated using cross-validation.

*How does this calculator compare with other online risk calculators?*

Other risk calculators may be based on data from adults and have not been well-validated in children. Some risk calculators are based on GFR and urine protein levels only. This calculator uses multiple variables that are commonly collected at clinical visits. In addition, other risk calculators predict time to kidney replacement therapy or a 50% decline in GFR. This calculator is based on the occurrence of kidney replacement therapy alone. Lastly, this calculator uses patient history of GFR (change in GFR over the course of a year) to better estimate when kidney replacement therapy is expected to occur.

*Does this calculator collect personal or private information?*

No, this calculator does not collect or store any personal information or clinical data. The calculator does not ask for name, date of birth or any information of that sort.

### ***Using the calculator***

*Is this calculator applicable to any patient?*

This calculator is designed to be used by healthcare providers for pediatric patients (17 years of age or younger) with a diagnosis of chronic kidney disease (non-glomerular or glomerular etiology) and GFR < 90 ml/min/1.73m<sup>2</sup> and is expected to be generalizable to North American patients who fit this profile.

*What if the patient does not have data (e.g., not measured, or not asked) for one or more questions?*

This calculator is unique in that the only requirements for KRT prediction are diagnosis, GFR and proteinuria level. Additional data including BP category, anemia, serum biomarkers and change in GFR over 1 year will improve the prediction, but are not necessary for a valid estimate.

*Does previous GFR have to be from exactly one year ago?*

No, the variables do not have to be from a visit exactly one year ago, but approximately one year ago. Clinical information from one year ago is used to indicate patient history. The calculator is based on models using data from clinical visits in the CKiD study approximately one year apart, so it is recommended to use that same time frame (plus or minus a few months). If you have information available from a patient's clinical visit approximately one year ago, you can use that information in the calculator to estimate time to kidney replacement therapy, but it is not necessary.

### ***Interpreting the results***

*Do the results identify when exactly the patient will have renal replacement therapy?*

No, the calculator cannot predict exactly when or if a particular patient will require renal replacement therapy. There are many factors that contribute to disease progression and the calculator does not capture all of them. These are estimates based on a large, representative cohort of children and adolescents with chronic kidney disease. Since the calculator provides estimates of time, variability of outcomes is shown for when 50%, 25% and 10% of patients with a similar profile will have KRT.

*How should I interpret the results?*

The calculator will estimate the time when 50%, 25% and 10% of patients with the same clinical profile as your patient will have renal replacement therapy. For example, if the results state 'Among patients with the same profile, 25% will have KRT by 6 years', this means that among patients with similar clinical profiles to your patient, 25% will be expected to have KRT within 6 years and 75% will be expected to have KRT after 6 years.

Supplementary Table S6. List of principal site investigators of the Chronic Kidney Disease in Children (CKiD) cohort study.

| <b>Study Investigator(s)</b>                                                                | <b>Institution</b>                                            | <b>City</b>  | <b>State/Province</b>    |
|---------------------------------------------------------------------------------------------|---------------------------------------------------------------|--------------|--------------------------|
| Sahar Fathallah-Shaykh, MD                                                                  | University of Alabama at Birmingham (Children's of Alabama)   | Birmingham   | AL                       |
| Anjali Nayak, MD; Martin Turman, MD                                                         | Phoenix Children's Hospital                                   | Phoenix      | AZ                       |
| Tom Blydt-Hansen, MD, FRCPC                                                                 | British Columbia Children's Hospital                          | Vancouver    | British Columbia, Canada |
| Cynthia Wong, MD; Steve Alexander, MD                                                       | Stanford University                                           | Palo Alto    | CA                       |
| Ora Yadin, MD                                                                               | University of California – Los Angeles (UCLA)                 | Los Angeles  | CA                       |
| Elizabeth Ingulli, MD; Robert Mak, MD, PhD                                                  | University of California – San Diego (UCSD)                   | San Diego    | CA                       |
| Cheryl Sanchez-Kazi, MD                                                                     | Loma Linda University                                         | Loma Linda   | CA                       |
| Asha Moudgil, MD                                                                            | Children's National Medical Center                            | Washington   | DC                       |
| Samina Muneeruddin, MD                                                                      | Nemours Hospital for Children- Delaware Valley                | Wilmington   | DE                       |
| Carolyn Abitbol, MD; Marissa DeFrietas, MD; Chryso Katsoufis, MD; Wacharee Seeherunvong, MD | University of Miami                                           | Miami        | FL                       |
| Larry Greenbaum, MD, PhD                                                                    | Children's Healthcare of Atlanta / Emory University           | Atlanta      | GA                       |
| Lyndsay Harshman, MD                                                                        | University of Iowa                                            | Iowa City    | IA                       |
| Priya Verghese, MD                                                                          | Ann & Robert H. Lurie Children's Hospital of Chicago          | Chicago      | IL                       |
| Sonia Krishnan, MD                                                                          | University of Illinois at Chicago                             | Chicago      | IL                       |
| Amy Wilson, MD                                                                              | Riley Hospital for Children at Indiana University Health      | Indianapolis | IN                       |
| Stefan Kiessling, MD; Margaret Murphy, PhD                                                  | University of Kentucky                                        | Lexington    | KY                       |
| Siddharth Shah, MD, Janice Sullivan, MD; Sushil Gupta, MD                                   | University of Louisville (Novak Center for Children's Health) | Louisville   | KY                       |
| Samir El-Dahr, MD; Stacy Drury, MD                                                          | Tulane University                                             | New Orleans  | LA                       |
| Nancy Rodig, MD                                                                             | Boston Children's Hospital                                    | Boston       | MA                       |
| Allison Dart, MD MSc, FRCPC                                                                 | University of Manitoba (The Children's Hospital)              | Winnipeg     | Manitoba, Canada         |

|                                                    |                                                                    |                 |                 |
|----------------------------------------------------|--------------------------------------------------------------------|-----------------|-----------------|
|                                                    | Research Institute of Manitoba)                                    |                 |                 |
| Meredith Atkinson, MD                              | Johns Hopkins University (Johns Hopkins Children's Center)         | Baltimore       | MD              |
| Arlene Gerson, PhD                                 |                                                                    | Baltimore       | MD              |
| Tej Matoo, MD                                      | Children's Hospital of Michigan / Wayne State University           | Detroit         | MI              |
| Zubin Modi, MD                                     | University of Michigan                                             | Ann Arbor       | MI              |
| Jason Thomas, MD                                   | Spectrum Health Hospitals / Helen DeVos Children's Hospital        | Grand Rapids    | MI              |
| Bradley Warady, MD; Rebecca Johnson, PhD           | Children's Mercy Hospital                                          | Kansas City     | MO              |
| Vikas Dharnidharka, MD                             | Washington University in St. Louis (St. Louis Children's Hospital) | St. Louis       | MO              |
| Stephen Hooper, PhD                                | University of North Carolina                                       | Chapel Hill     | NC              |
| Susan Massengill, MD                               | Levine Children's Hospital                                         | Charlottesville | NC              |
| Liliana Gomez-Mendez, MD                           | East Carolina University                                           | Greenville      | NC              |
| Matthew Hand, DO                                   | Dartmouth-Hitchcock Medical Center                                 | Lebanon         | NH              |
| Joann Carlson, MD                                  | Rutgers-Robert Wood Johnson Medical School                         | New Brunswick   | NJ              |
| Craig Wong, MD, MPH                                | University of New Mexico Health Sciences Center                    | Albuquerque     | NM              |
| Frederick Kaskel, MD, PhD; Shlomo Shinnar, MD, PhD | Albert Einstein College of Medicine/Montefiore Medical Center      | Bronx           | NY              |
| Jeffrey Saland, MD                                 | Icahn School of Medicine at Mount Sinai                            | New York        | NY              |
| Marc Lande, MD; George Schwartz, MD                | University of Rochester Medical Center                             | Rochester       | NY              |
| Anil Mongia, MD                                    | State University of New York, Downstate Medical Center             | Brooklyn        | NY              |
| Donna Claes, MD; Mark Mitsnefes, MD                | Cincinnati Children's Hospital                                     | Cincinnati      | OH              |
| Katherine Dell, MD                                 | Case Western Reserve University/Cleveland Clinic Children's        | Cleveland       | OH              |
| Hiren Patel, MD                                    | Nationwide Children's Hospital                                     | Columbus        | OH              |
| Pascale Lane, MD                                   | University of Oklahoma Health Sciences Center                      | Oklahoma City   | OK              |
| Rulan Parekh, MD; Lisa Robinson, MD                | Hospital for Sick Children (Sick Kids)                             | Toronto         | Ontario, Canada |

|                                                     |                                                                     |                  |    |
|-----------------------------------------------------|---------------------------------------------------------------------|------------------|----|
| Amira Al-Uzri, MD,<br>MCR; Kelsey<br>Richardson, MD | Oregon Health and Science<br>University                             | Portland         | OR |
| Susan Furth, MD, PhD;<br>Larry Copelovitch, MD      | Children's Hospital of<br>Philadelphia                              | Philadelphia     | PA |
| Elaine Ku, MD, MAS                                  | University of California –<br>San Francisco (UCSF)                  | San<br>Francisco | SF |
| Joshua Samuels, MD                                  | University of Texas Health<br>Science Center at Houston             | Houston          | TX |
| Poyyapakkam Srivaths,<br>MD                         | Baylor College of Medicine<br>(Texas Children's Hospital)           | Houston          | TX |
| Samhar Al-Akash, MD                                 | Driscoll Children's Hospital                                        | Corpus Christi   | TX |
| Davoud Mohtat, MD                                   | INOVA Children's Hospital /<br>Pediatric Specialists of<br>Virginia | Fairfax          | VA |
| Victoria Norwood, MD                                | University of Virginia                                              | Charlottesville  | VA |
| Joseph Flynn, MD                                    | Seattle Children's Hospital                                         | Seattle          | WA |
| Cynthia Pan, MD                                     | Medical College of<br>Wisconsin                                     | Milwaukee        | WI |
| Sharon Bartosh, MD                                  | University of Wisconsin                                             | Madison          | WI |
